# Supplementary material
Source: HighWire-hosted journal article supplement (https://ard.bmj.com/highwire/filestream/202221/field_highwire_adjunct_files/1/ARD_text_143032.docx)
Supplement: ARD_text_143032.docx [file ARD_text_143032.docx]

Online supplementary text file

Heiberg T et al:

PERFORMANCE OF THE RHEUMATOID ARTHRITIS IMPACT OF DISEASE (RAID) SCORE IN RELATION TO OTHER PATIENT REPORTED OUTCOMES IN A REGISTER OF PATIENTS WITH RHEUMATOID ARTHRITIS

**Instruments**

Rheumatoid Arthritis Disease Activity Index (RADAI) (1) is a self-reported questionnaire including questions on disease activity, joint tenderness, pain, morning stiffness and perceived joint pain in 16 joint areas. The scores from the five items are summarised into a disease activity index with a range from 0 to 10.

SF-36 is a 36-item measure of eight different dimensions of health status, represented in eight scales with of scores from 0 to 100 (100 best health): physical functioning, physical role, bodily pain, general health, vitality, social functioning, emotional role and mental health.(2) Physical (PCS) and mental (MCS) component summary scores were aggregated from SF-36.(3)

The utility measure SF-6D is a score based on SF-36 and was computed according to an algorithm developed by Brazier et al.(4) The scores range from 0 (dead) to 1 (perfect health).

The utility measure EQ5D (5) captures five health dimensions (mobility, self-care, usual activity, pain/discomfort and anxiety/depression). Three response categories are available for each dimension, allowing for 243 different health states with values on a range from -0.59 to 1.0.

Health Assessment Questionnaire (HAQ) comprises 20 questions covering eight categories (dressing, rising, eating, walking, hygiene, reach, grip and usual activities), with a score range (0-3, 3 worst health).(6)

The sleep module of the medical outcomes study (7) was used to measure sleep disturbances on a scale from 0 to 100 with higher scores with increasing sleep disturbances.

Self-efficacy scales for function (9 items), pain (5-item) and symptom (6-item) were measured on Lorig’s scale with the range of 10-100.(8). The value 100 corresponds to high confidence in ability to influence functions/symptoms.

The short form Rheumatology Attitude Index (RAI-5) (9) consists of 5 belief statements on learned helplessness. Patients are asked to respond to each of the 5 statements in a 5-point Likert scale. A score with range 0-4 was computed (high score low level of helplessness).

Reference List

(1) Fransen J, Langenegger T, Michel BA, Stucki G. Feasibility and validity of the RADAI, a self-administered rheumatoid arthritis disease activity index. Rheumatology (Oxford) 2000 Mar;39(3):321-7.

(2) Ware JE, Jr., Sherbourne CD. The MOS 36-item short-form health survey (SF-36). I. Conceptual framework and item selection. Med Care 1992 Jun;30(6):473-83.

(3) Ware JE, Jr. SF-6D physical and mental summary scales: a users manual. 1994. Boston MA: The Health Institute, New England Medical Center.

(4) Brazier J, Roberts J, Deverill M. The estimation of a preference-based measure of health from the SF-36. J Health Econ 2002 Mar;21(2):271-92.

(5) Greiner W, Weijnen T, Nieuwenhuizen M, Oppe S, Badia X, Busschbach J, et al. A single European currency for EQ-5D health states. Results from a six-country study. Eur J Health Econ 2003 Sep;4(3):222-31.

(6) Wolfe F, Kleinheksel SM, Cathey MA, Hawley DJ, Spitz PW, Fries JF. The clinical value of the Stanford Health Assessment Questionnaire Functional Disability Index in patients with rheumatoid arthritis. J Rheumatol 1988 Oct;15(10):1480-8.

(7) Hays RD, Martin SA, Sesti AM, Spritzer KL. Psychometric properties of the Medical Outcomes Study Sleep measure. Sleep Med 2005 Jan;6(1):41-4.

(8) Lorig K, Chastain RL, Ung E, Shoor S, Holman HR. Development and evaluation of a scale to measure perceived self-efficacy in people with arthritis. Arthritis Rheum 1989 Jan;32(1):37-44.

(9) DeVellis RF, Callahan LF. A brief measure of helplessness in rheumatic disease: the helplessness subscale of the Rheumatology Attitudes Index. J Rheumatol 1993 May;20(5):866-9.
